# Supplementary material for: Study on Yang-Xu Using Body Constitution Questionnaire and Blood Variables in Healthy Volunteers
Source: Hindawi journal article supplement (doi:10.1155/2016/9437382), 2016-01-01
Supplement: f1 [file 9437382.f1.pdf]

Supplementary Table S1

|     | <i>Yang-Xu</i> | <i>Yin-Xu</i> | <i>Stasis</i> | Mark     | Stndrome    | Male | Female | Total |
|-----|----------------|---------------|---------------|----------|-------------|------|--------|-------|
| BCQ | 0              | 0             | 0             | 0        | Healthy     | 56   | 32     | 88    |
|     | 1              | 0             | 0             | Excluded |             | 4    | 4      | 62    |
|     | 0              | 1             | 0             |          |             | 6    | 11     |       |
|     | 0              | 0             | 1             |          |             | 0    | 2      |       |
|     | 1              | 1             | 0             |          |             | 7    | 13     |       |
|     | 1              | 0             | 1             |          |             | 1    | 6      |       |
|     | 0              | 1             | 1             |          |             | 1    | 7      |       |
|     | 1              | 1             | 1             | 1        | Sub-Healthy | 17   | 25     | 42    |

In *Yang-Xu* (The total score range is 19-95). 0 means score  $\leq 31$ , 1 means score  $\geq 32$ .

In *Yin-Xu* (The total score range is 19-95). 0 means score  $\leq 30$ , 1 means score  $\geq 31$ .

In *Stasis* (The total score range is 16-80). 0 means score  $\leq 27$ , 1 means score  $\geq 28$ .

Supplementary Table S2

Comparison of selected parameters of *Yang-Xu* male and female subjects (I); *Yang-Xu* vs. Non-*Yang-Xu* subjects classified by BCQ (II).

(I)

|                                           | Gender | TSH | CRE | LH | RBC | HB | MONO |
|-------------------------------------------|--------|-----|-----|----|-----|----|------|
| <i>Yang-Xu</i> (vs. non- <i>Yang-Xu</i> ) | Male   | ↓   | ↑   | ↑  | ↓   | ↓  | ↑    |
|                                           | Female | ↑   | ↓   | ↓  | ↓   | ↓  | ↑    |
|                                           | total  | ↓   | ↓   | ↑  | ↓   | ↓  | ↑    |

(II)

|                                           | TSH | CRE | LH | RBC | HB | MONO |
|-------------------------------------------|-----|-----|----|-----|----|------|
| <i>Yang-Xu</i> (vs. non- <i>Yang-Xu</i> ) | ↓   | ↓   | ↑  | ↓   | ↓  | ↑    |

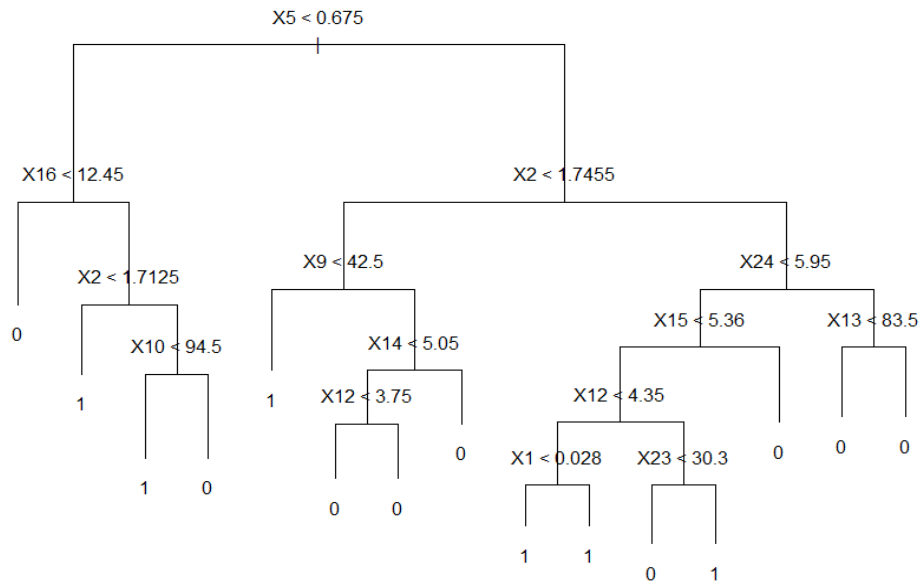

Supplementary Figure S1. Full model of BCQ. A BCQ decision tree shows the full model. Obviously, some leaves are redundant.

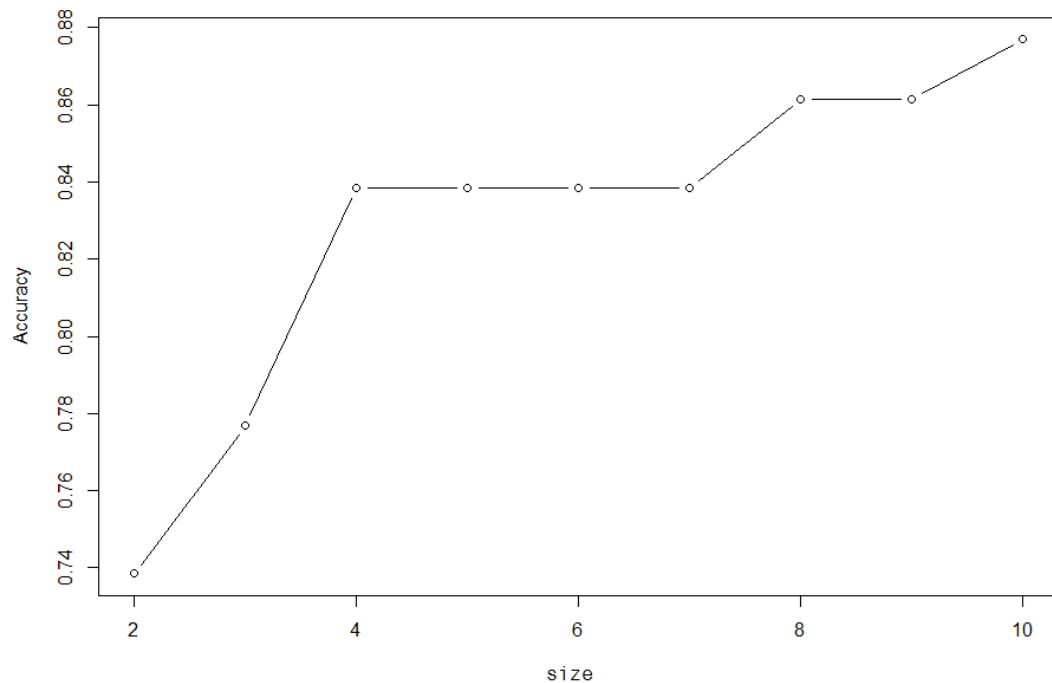

Supplementary Figure S2. Relative high accuracy when tree size four is chosen. A BCQ decision tree in Figure S1 shows some redundant leaves. Deviance was introduced to prune the full tree. After choosing tree size four, it maintained the relative high accuracy.
